# Supplementary material for: Relaxation behavior of shear-induced crystallization precursors in isotactic polypropylene containing sorbitol-based nucleating agents with different nucleating abilities
Source: Royal Society of Chemistry journal article supplement (doi:10.1039/c6cp00242k), 2016-01-01
Supplement: c6cp00242k1.pdf [file c6cp00242k1.pdf]

## Supporting Information

### Relaxation behavior of shear-induced crystallization precursors in isotactic polypropylene containing sobitol-based nucleating agents with different nucleating abilities

Jiashu Fan, Qinglong Zhang, Dingding Hu, Qilin Ren, and Jiachun Feng\*

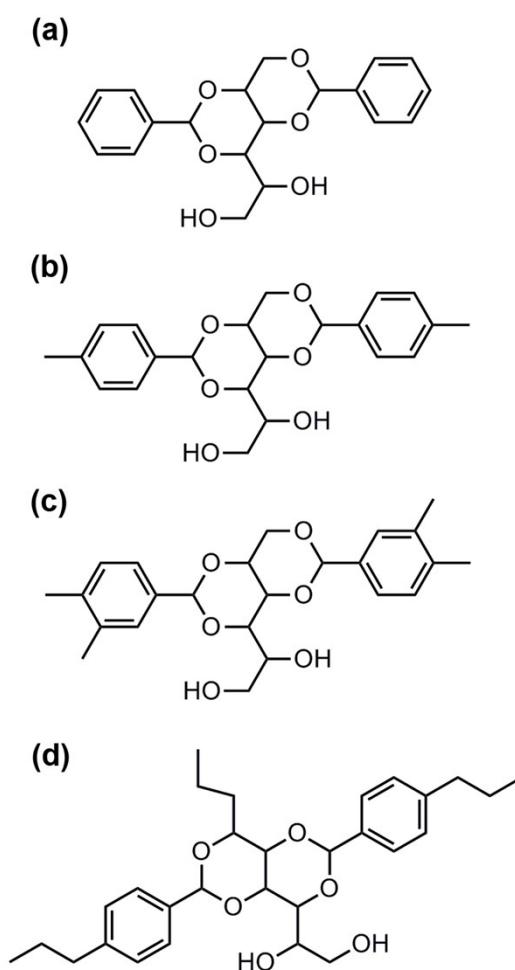

**Fig. S1** Chemical structures of Millad<sup>®</sup> 3905 (a), 3940 (b), 3988 (c) and NX8000K (d) used in this work.

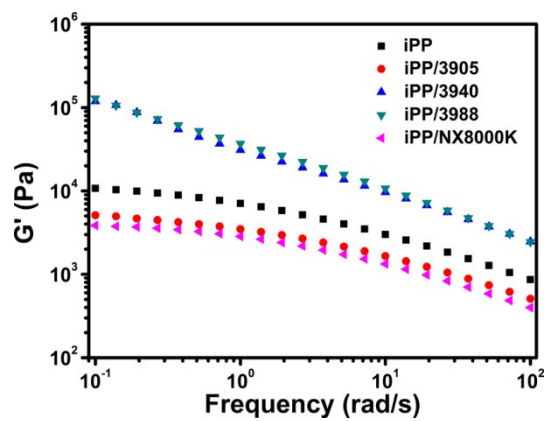

**Fig. S2** Evolution of viscosity with frequency in pure and nucleated iPP at 180 °C with a strain of 1%.

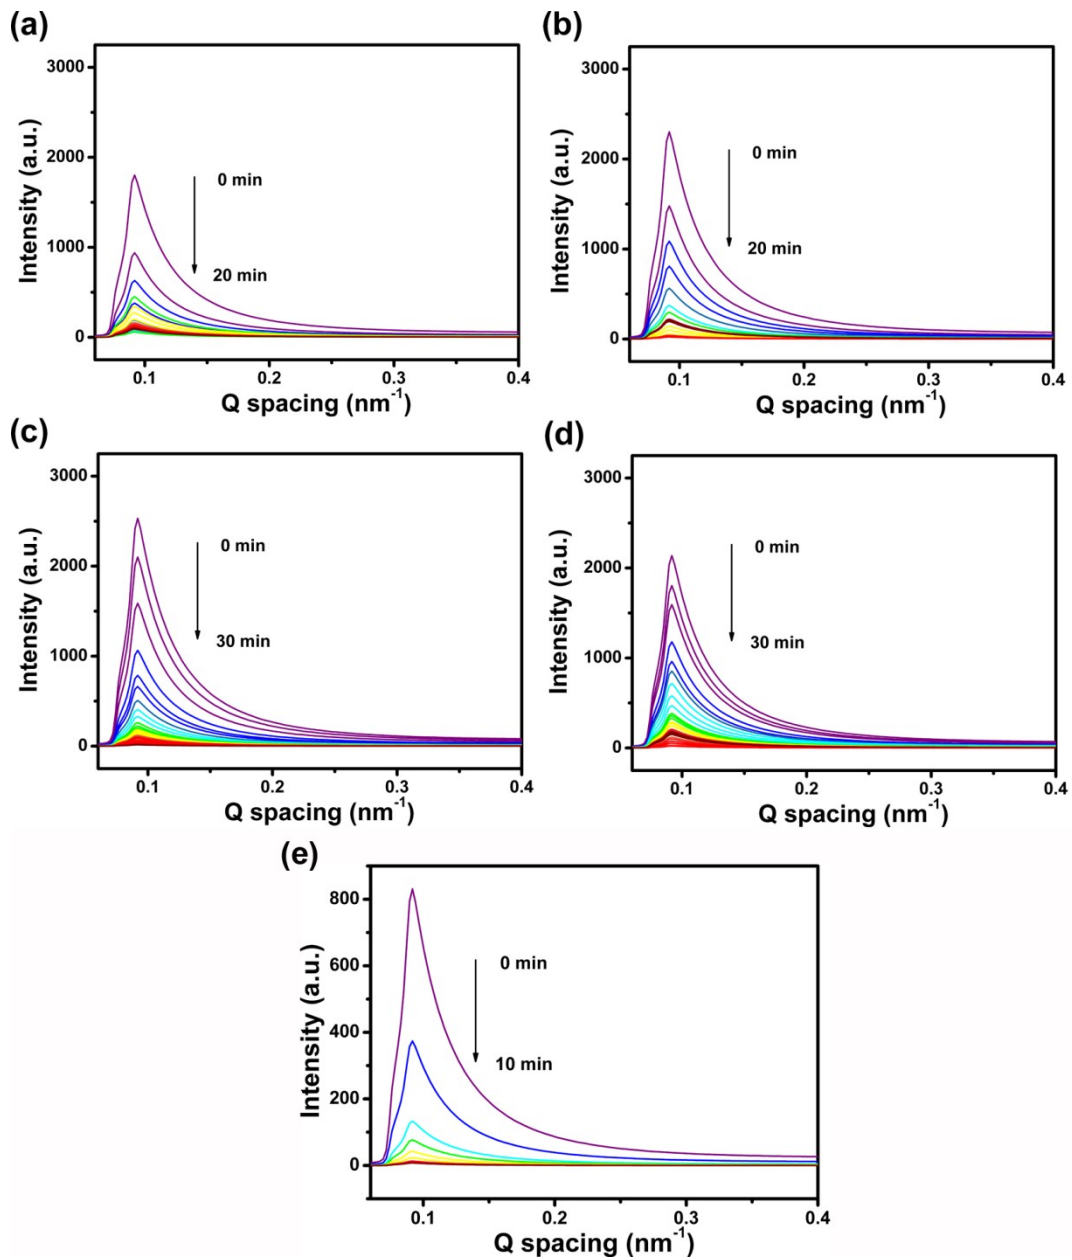

**Fig. S3** 1-D SAXS profiles of iPP nucleated by NX8000K (a), 3988 (b), 3940 (c), 3905 (d) and pure iPP (e) achieved by converting the 2D SAXS patterns using Fit2D software.
